# Supplementary material for: Life-Cycle Assessment of Bio-Jet Fuel Production from Waste Cooking Oil via Hydroconversion
Source: MDPI journal article supplement (doi:10.3390/en15186612), 2022-09-09
Supplement: s1 [file s1]

# Life-cycle assessment analysis of bio-jet fuel production from waste cooking oil via hydroconversion

Zhang Zongwei, <sup>a</sup> Wei Keheng, <sup>b</sup> Li Junqi, <sup>b</sup> Wang Zihan <sup>b</sup>

<sup>a</sup> College of Aeronautical Engineering, Civil Aviation University of China, 300300, Tianjin, China

<sup>b</sup> Transportation Science and Engineering, Civil Aviation University of China, 300300, Tianjin, China

## 1. Hydrogen consumption

Table S1. The results of hydrotreatment waste cooking over NiMo/8AHFS-Y [1]

| Sample       | YOLP % | SC4-8 % | SC9-15 % | SC16-18 % | C17/C18 | CO/CO <sub>2</sub> |
|--------------|--------|---------|----------|-----------|---------|--------------------|
| NiMo/8AHFS-Y | 82.3   | 30.0    | 42.3     | 27.7      | 1.9     | 0                  |

Table S2. Chemical properties of waste cooking oil and soybean oil [1,2]

| Property                    | Waste cooking oil | Molecular weight | Soybean oil |
|-----------------------------|-------------------|------------------|-------------|
| Palmitic acid (C16:0, wt%)  | 25.0              | 256.4            | 10.7        |
| Linoleic acid (C18:2, wt %) | 28.9              | 280.4            | 56.3        |
| Oleic acid (C18:1, wt %)    | 39.7              | 284.3            | 24.2        |
| Stearic acid (C18:0, wt %)  | 6.3               | 282.5            | 5.0         |
| Acid value (mgKOH/g)        | 65.5              |                  | 0.1         |

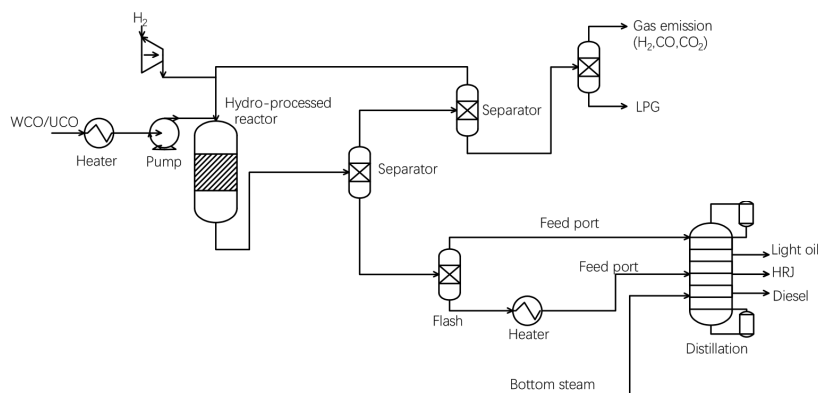

Figure S1. Preparation of jet fuel by one-step hydrogenation of waste cooking oil

Table S3. HDO reaction equations [2, 3]

| Reactions |                                                                                             |
|-----------|---------------------------------------------------------------------------------------------|
| R.1       | $\text{C18:1} + \text{H}_2 \rightarrow \text{C}_{17}\text{H}_{36} + \text{CO}_2$            |
| R.2       | $\text{C18:1} + 4 \text{H}_2 \rightarrow \text{C}_{18}\text{H}_{38} + 2 \text{H}_2\text{O}$ |
| R.3       | $\text{C18:2} + 2 \text{H}_2 \rightarrow \text{C}_{17}\text{H}_{36} + \text{CO}_2$          |
| R.4       | $\text{C18:2} + 5 \text{H}_2 \rightarrow \text{C}_{18}\text{H}_{38} + 2 \text{H}_2\text{O}$ |
| R.5       | $\text{C16:0} \rightarrow \text{C}_{15}\text{H}_{32} + \text{CO}_2$                         |
| R.6       | $\text{C16:0} + 3 \text{H}_2 \rightarrow \text{C}_{16}\text{H}_{34} + 2 \text{H}_2\text{O}$ |
| R.7       | $\text{C18:0} \rightarrow \text{C}_{17}\text{H}_{36} + \text{CO}_2$                         |
| R.8       | $\text{C18:0} + 3 \text{H}_2 \rightarrow \text{C}_{18}\text{H}_{38} + 2 \text{H}_2\text{O}$ |
| R.9       | $\text{CO} + \text{H}_2\text{O} \leftrightarrow \text{CO}_2 + \text{H}_2$ (ignore)          |

Table S4. The hydrogen consumes of triglycerides [3]

| Triglyceride Scission | Mole (kmol/day)    | Mass (ton/day) |
|-----------------------|--------------------|----------------|
| Fatty acids formed    | $2.18 \times 10^3$ | 600            |
| Hydrogen consumed     | $1.46 \times 10^3$ | 2.9            |

The data of hydrogen requirements for hydrocracking is from Table S8 in the Supplementary Material of reference 3.

## 2. Data summary

Table S5. Hydrogen consumption / (ton /d)

| Glycerol<br>conversion | Double bond<br>saturation | HDO<br>reaction | Cracking<br>reaction | Total | Consume | Residue |
|------------------------|---------------------------|-----------------|----------------------|-------|---------|---------|
| 2.9                    | 4.2                       | 4.5             | 5.1                  | 30.1  | 16.7    | 13.4    |

Table S6. Composition of the gas phase

| Component  | H <sub>2</sub> | CO <sub>2</sub> | C <sub>3</sub> H <sub>8</sub> |
|------------|----------------|-----------------|-------------------------------|
| Volume (%) | 96.4           | 2.1             | 1.5                           |

Table S7. Quality Composition of the products

| Product | Component                       | Yield |
|---------|---------------------------------|-------|
| Water   | H <sub>2</sub> O                | 0.04  |
| Liquid  | C <sub>8</sub> H <sub>16</sub>  | 0.22  |
|         | C <sub>12</sub> H <sub>26</sub> | 0.34  |
|         | C <sub>17</sub> H <sub>36</sub> | 0.22  |
| Gas     | CO <sub>2</sub>                 | 0.10  |
|         | C <sub>3</sub> H <sub>8</sub>   | 0.07  |

### 3. Basic data

Table S8. The price of refined oils, RMB/ Ton

| Refined oil | Price |
|-------------|-------|
| LPG         | 5123  |
| Naphtha     | 4794  |
| Gasoline    | 8639  |
| Jet fuel    | 4595  |
| Diesel      | 7050  |

The price (including tax, October 2021) of petroleum-based oil products of was from Dagang refinery of Sinopec (Tianjin).

Table S9. The fuel consumption of fossil energy extraction process, % [4]

| The proportion of fuel used<br>in production processes | Crude oil | Fuel oil | Diesel | Gasoline | Natural Gas | Coal | Electricity |
|--------------------------------------------------------|-----------|----------|--------|----------|-------------|------|-------------|
| Crude oil                                              | 0         | 0.1      | 4.9    | 0.5      | 0.4         | 78.1 | 15.9        |
| Coal                                                   | 50.1      | 6.3      | 13.8   | 1.6      | 0           | 5.5  | 22.7        |
| Natural Gas                                            | 0         | 3.5      | 7.7    | 0.9      | 72          | 3    | 12.9        |

Table S10. The proportion for various modes of fuel transportation in China [5]

| Mode of transport | Coal | Crude oil | Natural Gas | Jet fuel |
|-------------------|------|-----------|-------------|----------|
| Highway           | 27.0 | 0.0       | 2.0         | 10.0     |
| Waterway          | 18.0 | 16.0      | 0.0         | 10.0     |
| Railway           | 55.0 | 55.0      | 0.0         | 10.0     |
| Pipage            | 0.0  | 29.0      | 71.0        | 70.0     |

Table S11. Fuel consumption by different modes of transport [6]

| Transport category | Type of energy consumed | Consumption coefficient | Unit        |
|--------------------|-------------------------|-------------------------|-------------|
| Highway            | Diesel                  | 0.05                    | L/(t·km)    |
| Highway            | Gasoline                | 0.08                    | L/(t·km)    |
| Railway            | Electricity             | 0.02                    | KW·h/(t·km) |
| Railway            | Diesel                  | 0.03                    | L/(t·km)    |

Table S12. Energy consumption and GHG emissions from different hydrogen sources

| Hydrogen source | Energy consumption /(MJ/MJ) | GHG emissions (g/MJ) |
|-----------------|-----------------------------|----------------------|
| Natural Gas     | 1.6                         | 95.7                 |
| Coal            | 2.3                         | 197.6                |
| Nuclear energy  | 1.3                         | 21.0                 |
| Solar energy    | 1.7                         | 19.0                 |
| biomass         | 2.3                         | 13.1                 |

The data of Table S12 was from GREET.

Table S13. Life cycle energy consumption and GHG emissions from different diesel sources

| Diesel source | Energy consumption /(MJ/MJ) | GHG emissions (g/MJ) |
|---------------|-----------------------------|----------------------|
| Crude oil     | 0.3                         | 33.3                 |
| Soybean       | 0.7                         | 30.8                 |
| Animal fat    | 0.9                         | 19.8                 |
| Plant residue | 2.0                         | 24.9                 |

The data of Table S13 was from GREET.

## References

- [1] Zhang ZW, Zhang XW, Chen H, Wang QF. Hydroconversion of Waste Cooking Oil into Green Biofuel over Hierarchical USY-Supported NiMo Catalyst: A Comparative Study of Desilication and Dealumination, *Catalysts* 2017; 7:281. <https://doi.org/10.3390/catal7100281>.
- [2] Zhang ZW, Zhang XW, Wang QF. Influence of Impurities and Oxidation on Hydroconversion of Waste Cooking Oil into Bio-jet Fuel. *Chem. Eng. Technol.* 2020; 43:273–81. <https://doi.org/10.1002/ceat.201900357>.
- [3] Barbera E, Naurzaliyev R, Asiedu A, Bertuccio A, Resurreccion EP, Kumar S. Techno-economic analysis and life-cycle assessment of jet fuels production from waste cooking oil via in situ catalytic transfer hydrogenation. *Renew Energ* 2020; 160:428-449. <https://doi.org/10.1016/j.renene.2020.06.077>.
- [4] China Energy Statistics Yearbook 2020, China Statistics Press, National Bureau of statistics, 2020. Available online: <http://www.tjcn.org/tjnj/NNN/39747.html> (accessed on 25 Jun 2021).
- [5] China Transportation Yearbook 2020, People's Communications Press, Ministry of transport, 2020. Available online: <http://nianjian.xiaze.com/down/2022/zgjtj-htm-2020.html> (accessed on 1 February 2022).
- [6] He JC, Wu HW, Xu YQ. Energy Consumption of Locomotives in China Railways during 1975-2007. *Journal of Transportation Systems Engineering and Information Technology.* 2010; 22-27. DOI: 10.16097/j.cnki.1009-6744.2010.05.024.
